# Supplementary material
Source: Springer Nature journal article supplement (https://www.springermedizin.de/resource/supplementary/12889_2013_5272_MOESM2_ESM.pdf/9495010)
Supplement: MOESM2 [file 9495010]

## Distal determinants

### **Attitude**

(Advantages vs.  
Disadvantages)

### **Social influence**

(Social norm, direct  
pressure, social learning,...)

### **Self-efficacy**

(Experiences, persuasion,  
physiological arousal,...)

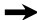

**Intention**

**Barriers**

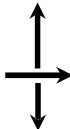

**Skills**

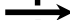

**Behavior**
